# Supplementary material for: On the method-dependence of transition state asynchronicity in Diels–Alder reactions
Source: Royal Society of Chemistry journal article supplement (doi:10.1039/c3cp44319a), 2013-01-01
Supplement: c3cp44319a.pdf [file c3cp44319a.pdf]

# **Electronic Supplementary Information for: On the method-dependence of transition state asynchronicity in Diels-Alder reactions**

Mats Linder and Tore Brinck\*

*Applied Physical Chemistry, KTH Royal Institute of Technology, Teknikringen 30, S-100 44  
Stockholm*

E-mail: [tore@physchem.kth.se](mailto:tore@physchem.kth.se)

## **Contents**

|          |                              |           |
|----------|------------------------------|-----------|
| <b>1</b> | <b>Supplementary figures</b> | <b>S2</b> |
|----------|------------------------------|-----------|

---

\*To whom correspondence should be addressed

# 1 Supplementary figures

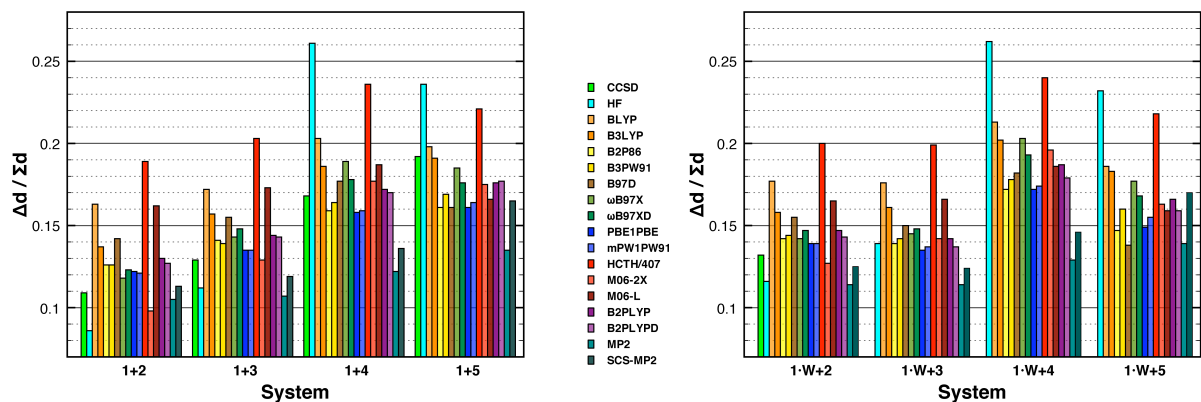

Figure S1: Relative transition state asynchronicity per system, represented by colored bars.  $\Delta d / \Sigma d = (d_{\alpha} - d_{\beta}) / (d_{\alpha} + d_{\beta})$  No CCSD geometries were optimized for the 1-W+3, 1-W+4 and 1-W+5 systems.

| 1 + 2    | CCSD | HF   | BLYP | B3LYP | B3P86 | B3PW91 | B97D | ωB97X | ωB97XD | PBE1PBE | mPW1PW91 | HCTH/407 | M06-2X | M06-L | B2PLYP | B2PLYPD | MP2  | 10xRMSD [Å] |
|----------|------|------|------|-------|-------|--------|------|-------|--------|---------|----------|----------|--------|-------|--------|---------|------|-------------|
| CCSD     | 0.00 | 0.66 | 0.96 | 0.58  | 0.52  | 0.54   | 0.58 | 0.22  | 0.30   | 0.49    | 0.46     | 1.48     | 0.36   | 1.05  | 0.41   | 0.42    | 0.57 | CCSD        |
| HF       | 0.66 | 0.00 | 1.20 | 0.81  | 0.99  | 0.90   | 1.04 | 0.84  | 0.85   | 0.97    | 0.89     | 1.59     | 0.96   | 1.62  | 0.92   | 1.04    | 1.19 | HF          |
| BLYP     | 0.96 | 1.20 | 0.00 | 0.42  | 0.59  | 0.50   | 0.47 | 0.89  | 0.74   | 0.63    | 0.60     | 0.56     | 1.14   | 0.89  | 0.63   | 0.81    | 1.07 | BLYP        |
| B3LYP    | 0.58 | 0.81 | 0.42 | 0.00  | 0.36  | 0.22   | 0.33 | 0.56  | 0.42   | 0.38    | 0.31     | 0.92     | 0.82   | 0.94  | 0.36   | 0.57    | 0.84 | B3LYP       |
| B3P86    | 0.52 | 0.99 | 0.59 | 0.36  | 0.00  | 0.17   | 0.19 | 0.39  | 0.24   | 0.05    | 0.10     | 1.11     | 0.60   | 0.68  | 0.15   | 0.29    | 0.51 | B3P86       |
| B3PW91   | 0.54 | 0.90 | 0.50 | 0.22  | 0.17  | 0.00   | 0.23 | 0.46  | 0.31   | 0.18    | 0.12     | 1.01     | 0.70   | 0.81  | 0.23   | 0.43    | 0.66 | B3PW91      |
| B97D     | 0.58 | 1.04 | 0.47 | 0.33  | 0.19  | 0.23   | 0.00 | 0.46  | 0.32   | 0.23    | 0.24     | 1.02     | 0.69   | 0.65  | 0.19   | 0.34    | 0.61 | B97D        |
| ωB97X    | 0.22 | 0.84 | 0.89 | 0.56  | 0.39  | 0.46   | 0.46 | 0.00  | 0.17   | 0.36    | 0.36     | 1.42     | 0.29   | 0.84  | 0.28   | 0.23    | 0.42 | ωB97X       |
| ωB97XD   | 0.30 | 0.85 | 0.74 | 0.42  | 0.24  | 0.31   | 0.32 | 0.17  | 0.00   | 0.22    | 0.21     | 1.27     | 0.43   | 0.79  | 0.13   | 0.21    | 0.46 | ωB97XD      |
| PBE1PBE  | 0.49 | 0.97 | 0.63 | 0.38  | 0.05  | 0.18   | 0.23 | 0.36  | 0.22   | 0.00    | 0.09     | 1.16     | 0.56   | 0.70  | 0.15   | 0.28    | 0.48 | PBE1PBE     |
| mPW1PW91 | 0.46 | 0.89 | 0.60 | 0.31  | 0.10  | 0.12   | 0.24 | 0.36  | 0.21   | 0.09    | 0.00     | 1.13     | 0.59   | 0.78  | 0.15   | 0.33    | 0.55 | mPW1PW91    |
| HCTH/407 | 1.48 | 1.59 | 0.56 | 0.92  | 1.11  | 1.01   | 1.02 | 1.42  | 1.27   | 1.16    | 1.13     | 0.00     | 1.68   | 1.29  | 1.17   | 1.35    | 1.60 | HCTH/407    |
| M06-2X   | 0.36 | 0.96 | 1.14 | 0.82  | 0.60  | 0.70   | 0.69 | 0.29  | 0.43   | 0.56    | 0.59     | 1.68     | 0.00   | 0.95  | 0.52   | 0.38    | 0.33 | M06-2X      |
| M06-L    | 1.05 | 1.62 | 0.89 | 0.94  | 0.68  | 0.81   | 0.65 | 0.84  | 0.79   | 0.70    | 0.78     | 1.29     | 0.95   | 0.00  | 0.71   | 0.64    | 0.72 | M06-L       |
| B2PLYP   | 0.41 | 0.92 | 0.63 | 0.36  | 0.15  | 0.23   | 0.19 | 0.28  | 0.13   | 0.15    | 0.15     | 1.17     | 0.52   | 0.71  | 0.00   | 0.22    | 0.50 | B2PLYP      |
| B2PLYPD  | 0.42 | 1.04 | 0.81 | 0.57  | 0.29  | 0.43   | 0.34 | 0.23  | 0.21   | 0.28    | 0.33     | 1.35     | 0.38   | 0.64  | 0.22   | 0.00    | 0.31 | B2PLYPD     |
| MP2      | 0.57 | 1.19 | 1.07 | 0.84  | 0.51  | 0.66   | 0.61 | 0.42  | 0.46   | 0.48    | 0.55     | 1.60     | 0.33   | 0.72  | 0.50   | 0.31    | 0.00 | MP2         |

Figure S2: 2-dimensional all-carbon RMSD matrices for the five systems optimized with CCSD. All figures have been scaled by a factor 10 for clarity.

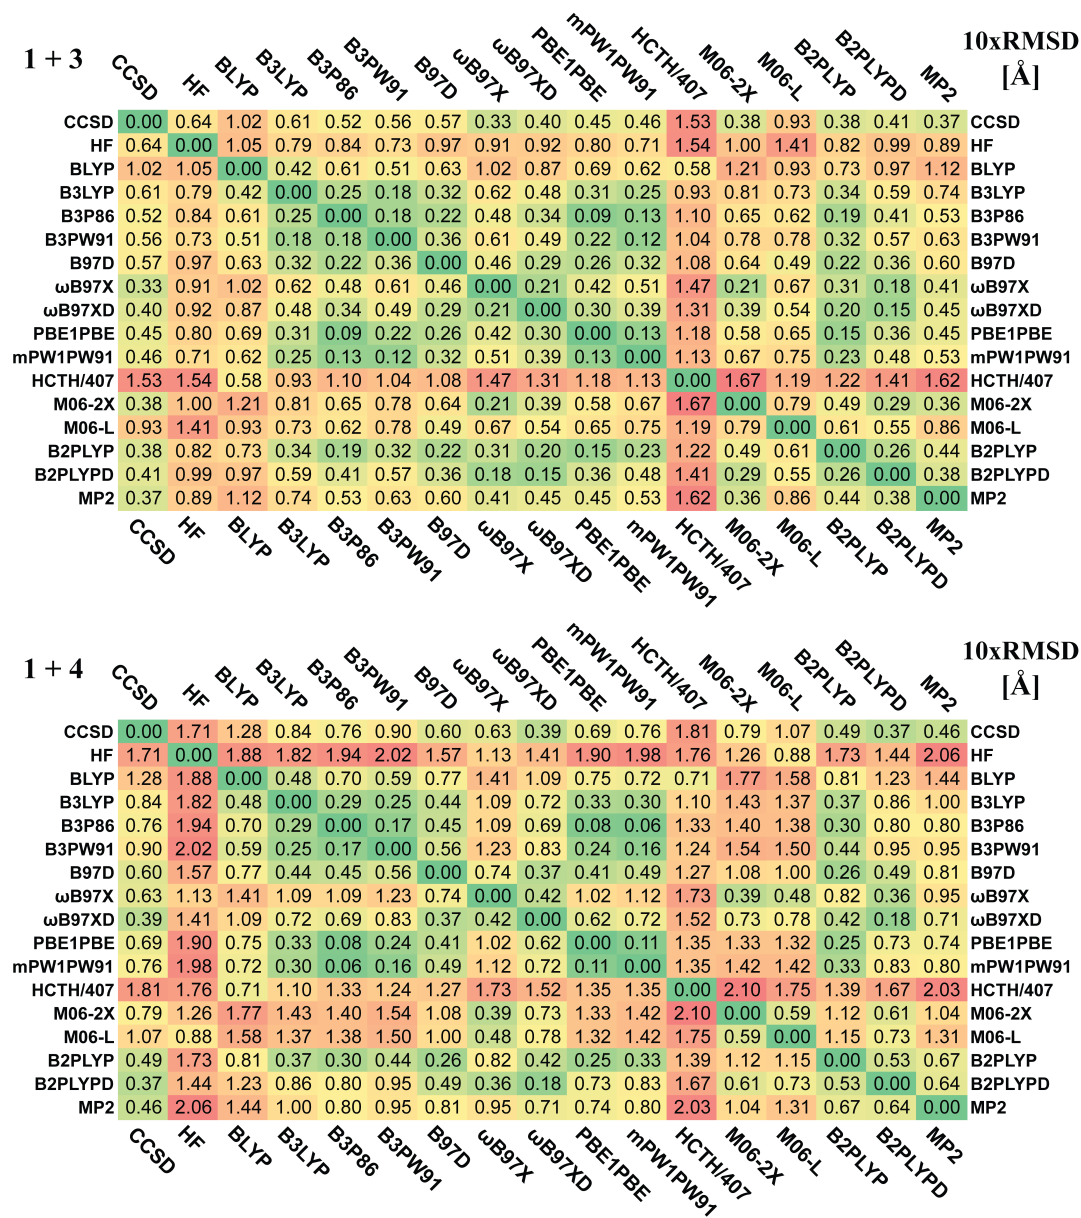

Figure S2 (continued)

| 1 + 5    |      | 10xRMSD [Å] |      |       |       |        |        |       |        |         |          |          |         |        |        |         |         |          |  |
|----------|------|-------------|------|-------|-------|--------|--------|-------|--------|---------|----------|----------|---------|--------|--------|---------|---------|----------|--|
|          | CCSD | HF          | BLYP | B3LYP | B3P86 | B3PW91 | B97D   | ωB97X | ωB97XD | PBE1PBE | mPW1PW91 | HCTH407  | M06-2X  | M06-L  | B2PLYP | B2PLYPD | MP2     |          |  |
| CCSD     | 0.00 | 0.71        | 0.78 | 0.50  | 0.59  | 0.64   | 0.45   | 0.20  | 0.30   | 0.58    | 0.59     | 1.36     | 0.25    | 0.39   | 0.33   | 0.32    | 0.62    | CCSD     |  |
| HF       | 0.71 | 0.00        | 0.64 | 0.57  | 0.86  | 0.81   | 0.87   | 0.67  | 0.74   | 0.85    | 0.84     | 0.91     | 0.84    | 0.91   | 0.74   | 0.92    | 1.28    | HF       |  |
| BLYP     | 0.78 | 0.64        | 0.00 | 0.33  | 0.56  | 0.46   | 0.63   | 0.73  | 0.71   | 0.56    | 0.55     | 0.72     | 0.89    | 0.89   | 0.56   | 0.82    | 1.11    | BLYP     |  |
| B3LYP    | 0.50 | 0.57        | 0.33 | 0.00  | 0.37  | 0.28   | 0.40   | 0.45  | 0.44   | 0.35    | 0.32     | 0.91     | 0.61    | 0.67   | 0.29   | 0.57    | 0.85    | B3LYP    |  |
| B3P86    | 0.59 | 0.86        | 0.56 | 0.37  | 0.00  | 0.20   | 0.35   | 0.48  | 0.38   | 0.04    | 0.12     | 1.16     | 0.57    | 0.62   | 0.28   | 0.46    | 0.68    | B3P86    |  |
| B3PW91   | 0.64 | 0.81        | 0.46 | 0.28  | 0.20  | 0.00   | 0.39   | 0.57  | 0.50   | 0.18    | 0.11     | 1.01     | 0.68    | 0.74   | 0.34   | 0.59    | 0.78    | B3PW91   |  |
| B97D     | 0.45 | 0.87        | 0.63 | 0.40  | 0.35  | 0.39   | 0.00   | 0.40  | 0.35   | 0.33    | 0.34     | 1.23     | 0.45    | 0.48   | 0.24   | 0.32    | 0.57    | B97D     |  |
| ωB97X    | 0.20 | 0.67        | 0.73 | 0.45  | 0.48  | 0.57   | 0.40   | 0.00  | 0.15   | 0.47    | 0.50     | 1.32     | 0.19    | 0.35   | 0.27   | 0.28    | 0.64    | ωB97X    |  |
| ωB97XD   | 0.30 | 0.74        | 0.71 | 0.44  | 0.38  | 0.50   | 0.35   | 0.15  | 0.00   | 0.37    | 0.42     | 1.32     | 0.25    | 0.38   | 0.22   | 0.23    | 0.60    | ωB97XD   |  |
| PBE1PBE  | 0.58 | 0.85        | 0.56 | 0.35  | 0.04  | 0.18   | 0.33   | 0.47  | 0.37   | 0.00    | 0.10     | 1.15     | 0.56    | 0.62   | 0.27   | 0.45    | 0.67    | PBE1PBE  |  |
| mPW1PW91 | 0.59 | 0.84        | 0.55 | 0.32  | 0.12  | 0.11   | 0.34   | 0.50  | 0.42   | 0.10    | 0.00     | 1.11     | 0.60    | 0.66   | 0.28   | 0.50    | 0.69    | mPW1PW91 |  |
| HCTH407  | 1.36 | 0.91        | 0.72 | 0.91  | 1.16  | 1.01   | 1.23   | 1.32  | 1.32   | 1.15    | 1.11     | 0.00     | 1.49    | 1.49   | 1.19   | 1.45    | 1.71    | HCTH407  |  |
| M06-2X   | 0.25 | 0.84        | 0.89 | 0.61  | 0.57  | 0.68   | 0.45   | 0.19  | 0.25   | 0.56    | 0.60     | 1.49     | 0.00    | 0.29   | 0.38   | 0.23    | 0.55    | M06-2X   |  |
| M06-L    | 0.39 | 0.91        | 0.89 | 0.67  | 0.62  | 0.74   | 0.48   | 0.35  | 0.38   | 0.62    | 0.66     | 1.49     | 0.29    | 0.00   | 0.45   | 0.28    | 0.58    | M06-L    |  |
| B2PLYP   | 0.33 | 0.74        | 0.56 | 0.29  | 0.28  | 0.34   | 0.24   | 0.27  | 0.22   | 0.27    | 0.28     | 1.19     | 0.38    | 0.45   | 0.00   | 0.28    | 0.59    | B2PLYP   |  |
| B2PLYPD  | 0.32 | 0.92        | 0.82 | 0.57  | 0.46  | 0.59   | 0.32   | 0.28  | 0.23   | 0.45    | 0.50     | 1.45     | 0.23    | 0.28   | 0.28   | 0.00    | 0.41    | B2PLYPD  |  |
| MP2      | 0.62 | 1.28        | 1.11 | 0.85  | 0.68  | 0.78   | 0.57   | 0.64  | 0.60   | 0.67    | 0.69     | 1.71     | 0.55    | 0.58   | 0.59   | 0.41    | 0.00    | MP2      |  |
|          |      | CCSD        | HF   | BLYP  | B3LYP | B3P86  | B3PW91 | B97D  | ωB97X  | ωB97XD  | PBE1PBE  | mPW1PW91 | HCTH407 | M06-2X | M06-L  | B2PLYP  | B2PLYPD | MP2      |  |
| 1·W + 2  |      | CCSD        | HF   | BLYP  | B3LYP | B3P86  | B3PW91 | B97D  | ωB97X  | ωB97XD  | PBE1PBE  | mPW1PW91 | HCTH407 | M06-2X | M06-L  | B2PLYP  | B2PLYPD | MP2      |  |
| CCSD     | 0.00 | 0.67        | 1.05 | 0.67  | 0.54  | 0.60   | 0.54   | 0.23  | 0.35   | 0.51    | 0.49     | 1.56     | 0.46    | 0.94   | 0.40   | 0.40    | 0.60    | CCSD     |  |
| HF       | 0.67 | 0.00        | 1.12 | 0.79  | 0.94  | 0.85   | 0.97   | 0.84  | 0.88   | 0.92    | 0.86     | 1.55     | 1.09    | 1.53   | 0.85   | 1.02    | 1.22    | HF       |  |
| BLYP     | 1.05 | 1.12        | 0.00 | 0.40  | 0.67  | 0.53   | 0.64   | 0.97  | 0.82   | 0.70    | 0.67     | 0.53     | 1.32    | 1.16   | 0.73   | 0.99    | 1.33    | BLYP     |  |
| B3LYP    | 0.67 | 0.79        | 0.40 | 0.00  | 0.40  | 0.23   | 0.40   | 0.63  | 0.49   | 0.42    | 0.36     | 0.90     | 1.00    | 1.03   | 0.41   | 0.69    | 1.04    | B3LYP    |  |
| B3P86    | 0.54 | 0.94        | 0.67 | 0.40  | 0.00  | 0.19   | 0.19   | 0.41  | 0.24   | 0.04    | 0.08     | 1.16     | 0.73    | 0.74   | 0.17   | 0.38    | 0.69    | B3P86    |  |
| B3PW91   | 0.60 | 0.85        | 0.53 | 0.23  | 0.19  | 0.00   | 0.28   | 0.53  | 0.37   | 0.21    | 0.15     | 1.03     | 0.87    | 0.90   | 0.27   | 0.55    | 0.86    | B3PW91   |  |
| B97D     | 0.54 | 0.97        | 0.64 | 0.40  | 0.19  | 0.28   | 0.00   | 0.40  | 0.24   | 0.21    | 0.22     | 1.14     | 0.71    | 0.67   | 0.17   | 0.35    | 0.70    | B97D     |  |
| ωB97X    | 0.23 | 0.84        | 0.97 | 0.63  | 0.41  | 0.53   | 0.40   | 0.00  | 0.19   | 0.39    | 0.40     | 1.47     | 0.38    | 0.72   | 0.27   | 0.20    | 0.50    | ωB97X    |  |
| ωB97XD   | 0.35 | 0.88        | 0.82 | 0.49  | 0.24  | 0.37   | 0.24   | 0.19  | 0.00   | 0.23    | 0.24     | 1.31     | 0.54    | 0.69   | 0.11   | 0.22    | 0.58    | ωB97XD   |  |
| PBE1PBE  | 0.51 | 0.92        | 0.70 | 0.42  | 0.04  | 0.21   | 0.21   | 0.39  | 0.23   | 0.00    | 0.08     | 1.19     | 0.70    | 0.74   | 0.17   | 0.36    | 0.66    | PBE1PBE  |  |
| mPW1PW91 | 0.49 | 0.86        | 0.67 | 0.36  | 0.08  | 0.15   | 0.22   | 0.40  | 0.24   | 0.08    | 0.00     | 1.16     | 0.73    | 0.80   | 0.16   | 0.40    | 0.71    | mPW1PW91 |  |
| HCTH407  | 1.56 | 1.55        | 0.53 | 0.90  | 1.16  | 1.03   | 1.14   | 1.47  | 1.31   | 1.19    | 1.16     | 0.00     | 1.81    | 1.53   | 1.23   | 1.47    | 1.81    | HCTH407  |  |
| M06-2X   | 0.46 | 1.09        | 1.32 | 1.00  | 0.73  | 0.87   | 0.71   | 0.38  | 0.54   | 0.70    | 0.73     | 1.81     | 0.00    | 0.71   | 0.62   | 0.37    | 0.30    | M06-2X   |  |
| M06-L    | 0.94 | 1.53        | 1.16 | 1.03  | 0.74  | 0.90   | 0.67   | 0.72  | 0.69   | 0.74    | 0.80     | 1.53     | 0.71    | 0.00   | 0.73   | 0.56    | 0.67    | M06-L    |  |
| B2PLYP   | 0.40 | 0.85        | 0.73 | 0.41  | 0.17  | 0.27   | 0.17   | 0.27  | 0.11   | 0.17    | 0.16     | 1.23     | 0.62    | 0.73   | 0.00   | 0.29    | 0.64    | B2PLYP   |  |
| B2PLYPD  | 0.40 | 1.02        | 0.99 | 0.69  | 0.38  | 0.55   | 0.35   | 0.20  | 0.22   | 0.36    | 0.40     | 1.47     | 0.37    | 0.56   | 0.29   | 0.00    | 0.39    | B2PLYPD  |  |
| MP2      | 0.60 | 1.22        | 1.33 | 1.04  | 0.69  | 0.86   | 0.70   | 0.50  | 0.58   | 0.66    | 0.71     | 1.81     | 0.30    | 0.67   | 0.64   | 0.39    | 0.00    | MP2      |  |
|          |      | CCSD        | HF   | BLYP  | B3LYP | B3P86  | B3PW91 | B97D  | ωB97X  | ωB97XD  | PBE1PBE  | mPW1PW91 | HCTH407 | M06-2X | M06-L  | B2PLYP  | B2PLYPD | MP2      |  |

Figure S2 (continued)
